# Supplementary material
Source: PubMed Central journal article supplement (PMC8711855)
Supplement: mmc1.pdf [file mmc1.pdf]

**Supplementary Data Tables**

**Table S1a: Reported Financial impact of COVID-19 pandemic on CF care team and care delivery (SoC1: Summer 2020)**

|                                                                                                                                                                                                               | <b>Total</b><br>(n = 286) | <b>Small</b><br>(n = 113) | <b>Medium</b><br>(n = 105) | <b>Large</b><br>(n = 68) | <b>Pediatric</b><br>(n = 128) | <b>Adult</b><br>(n = 118) | <b>Affiliate</b><br>(n = 40) | <b>P-value</b>                                                  |
|---------------------------------------------------------------------------------------------------------------------------------------------------------------------------------------------------------------|---------------------------|---------------------------|----------------------------|--------------------------|-------------------------------|---------------------------|------------------------------|-----------------------------------------------------------------|
| <b>Anticipated future support:</b> I anticipate that institution / hospital support for the CF program will continue at the pre-pandemic level.                                                               |                           |                           |                            |                          |                               |                           |                              | <sup>1</sup> 0.064<br><sup>2</sup> 0.583<br><sup>3</sup> 0.024  |
| Somewhat / strongly disagree                                                                                                                                                                                  | 50 (17.5)                 | 22 (19.5)                 | 10 (9.5)                   | 18 (26.5)                | 20 (15.6)                     | 20 (16.9)                 | 10 (25.0)                    |                                                                 |
| Neither agree nor disagree                                                                                                                                                                                    | 16 (5.6)                  | 6 (5.3)                   | 6 (5.7)                    | 4 (5.9)                  | 8 (6.3)                       | 5 (4.2)                   | 3 (7.5)                      |                                                                 |
| Somewhat / strongly agree                                                                                                                                                                                     | 220 (76.9)                | 85 (75.2)                 | 89 (84.8)                  | 46 (67.6)                | 100 (78.1)                    | 93 (78.8)                 | 27 (67.5)                    |                                                                 |
| <b>Current financial impact:</b> Have members of your program been impacted by actions that your institution / hospital has taken such as:                                                                    |                           |                           |                            |                          |                               |                           |                              |                                                                 |
| Any impact (% yes)                                                                                                                                                                                            | 177 (61.9)                | 66 (58.4)                 | 63 (60.0)                  | 48 (70.6)                | 85 (66.4)                     | 70 (59.3)                 | 22 (55.0)                    | <sup>1</sup> 0.232<br><sup>2</sup> 0.326<br><sup>3</sup> <0.001 |
| Re-deployed to other areas (% yes)                                                                                                                                                                            | 121 (68.4)                | 44 (66.7)                 | 41 (65.1)                  | 36 (75.0)                | 61 (71.8)                     | 44 (62.9)                 | 16 (72.7)                    | <sup>1</sup> 0.502<br><sup>2</sup> 0.443                        |
| Furloughs (% yes)                                                                                                                                                                                             | 92 (52.0)                 | 32 (48.5)                 | 35 (55.6)                  | 25 (52.1)                | 44 (51.8)                     | 31 (44.3)                 | 17 (77.3)                    | <sup>1</sup> 0.724<br><sup>2</sup> 0.026                        |
| Hiring freezes (% yes)                                                                                                                                                                                        | 90 (50.8)                 | 27 (40.9)                 | 30 (47.6)                  | 33 (68.8)                | 44 (51.8)                     | 38 (54.3)                 | 8 (36.4)                     | <sup>1</sup> 0.011<br><sup>2</sup> 0.332                        |
| Pay cuts (% yes)                                                                                                                                                                                              | 61 (34.5)                 | 14 (21.2)                 | 23 (36.5)                  | 24 (50.0)                | 29 (34.1)                     | 27 (38.6)                 | 5 (22.7)                     | <sup>1</sup> 0.006<br><sup>2</sup> 0.393                        |
| Layoffs (% yes)                                                                                                                                                                                               | 18 (10.2)                 | 11 (16.7)                 | 3 (4.8)                    | 4 (8.3)                  | 6 (7.1)                       | 4 (5.7)                   | 8 (36.4)                     | <sup>1</sup> 0.073<br><sup>2</sup> <.001                        |
| <b>Impact of COVID-response on quality:</b> Do you believe your CF program is delivering the same level of quality care despite actions that your institution / hospital took to respond to COVID-19? (% yes) | 127 (71.8)                | 47 (71.2)                 | 52 (82.5)                  | 28 (58.3)                | 61 (71.8)                     | 47 (67.1)                 | 19 (86.4)                    | <sup>1</sup> 0.019<br><sup>2</sup> 0.218<br><sup>3</sup> 0.052  |

1 = Analysis of dependent variable by program size; 2 = Analysis of dependent variable by program type.; 3 = Comparison between SoC1 and SoC2

14  
15  
16  
17  
18  
19  
20  
21  
22  
23  
24  
25  
26  
27  
28  
29  
30  
31  
32  
33  
34  
35  
36  
37  
38  
39  
40  
41  
42  
43  
44  
45  
46  
47  
48  
49  
50  
51  
52  
53  
54  
55  
56  
57  
58  
59  
60  
61  
62  
63  
64  
65

**Table S1b: Reported Financial impact of COVID-19 pandemic on CF care team and care delivery (SoC2: Spring 2021)**

|                                                                                                                                                                                                                  | Total<br>(n = 280) | Small<br>(n = 108) | Medium<br>(n = 104) | Large<br>(n = 68) | Pediatric<br>(n = 127) | Adult<br>(n = 115) | Affiliate<br>(n = 38) | P-value                                                         |
|------------------------------------------------------------------------------------------------------------------------------------------------------------------------------------------------------------------|--------------------|--------------------|---------------------|-------------------|------------------------|--------------------|-----------------------|-----------------------------------------------------------------|
| <b>Anticipated future support:</b> I anticipate that institution / hospital support for the CF program will continue at the pre-pandemic level. (n (%))                                                          |                    |                    |                     |                   |                        |                    |                       | <sup>1</sup> 0.445<br><sup>2</sup> 0.054<br><sup>3</sup> 0.024  |
| Somewhat / strongly disagree                                                                                                                                                                                     | 30 (10.7)          | 11 (10.2)          | 8 (7.7)             | 11 (16.2)         | 12 (10.7)              | 15 (13.0)          | 3 (7.9)               |                                                                 |
| Neither agree nor disagree                                                                                                                                                                                       | 13 (4.6)           | 5 (4.6)            | 4 (3.8)             | 4 (5.9)           | 1 (0.8)                | 9 (7.8)            | 3 (7.9)               |                                                                 |
| Somewhat / strongly agree                                                                                                                                                                                        | 237 (84.6)         | 92 (85.2)          | 92 (88.5)           | 53 (77.9)         | 114 (89.8)             | 91 (79.1)          | 32 (84.2)             |                                                                 |
| <b>Current financial impact:</b> Have members of your program been impacted by actions that your institution / hospital has taken such as: (n (% yes))                                                           |                    |                    |                     |                   |                        |                    |                       |                                                                 |
| Any impact (% yes)                                                                                                                                                                                               | 117 (41.8)         | 45 (41.7)          | 41 (39.4)           | 31 (45.6)         | 53 (41.7)              | 46 (40.0)          | 18 (47.4)             | <sup>1</sup> 0.725<br><sup>2</sup> 0.727<br><sup>3</sup> <0.001 |
| Re-deployed to other areas (% yes)                                                                                                                                                                               | 83 (70.9)          | 32 (71.1)          | 26 (63.4)           | 25 (80.6)         | 35 (66.0)              | 33 (71.7)          | 15 (83.3)             | <sup>1</sup> 0.280<br><sup>2</sup> 0.373                        |
| Furloughs (% yes)                                                                                                                                                                                                | 39 (33.3)          | 13 (28.9)          | 13 (31.7)           | 13 (41.9)         | 15 (28.3)              | 18 (39.1)          | 6 (33.3)              | <sup>1</sup> 0.477<br><sup>2</sup> 0.522                        |
| Hiring freezes (% yes)                                                                                                                                                                                           | 48 (41.0)          | 18 (40.0)          | 14 (34.1)           | 16 (51.6)         | 24 (45.3)              | 19 (41.3)          | 5 (27.8)              | <sup>1</sup> 0.323<br><sup>2</sup> 0.427                        |
| Pay cuts (% yes)                                                                                                                                                                                                 | 27 (23.1)          | 9 (20.0)           | 9 (22.0)            | 9 (29.0)          | 13 (24.5)              | 12 (26.1)          | 2 (11.1)              | <sup>1</sup> 0.641<br><sup>2</sup> 0.417                        |
| Layoffs (% yes)                                                                                                                                                                                                  | 13 (11.1)          | 7 (15.6)           | 5 (12.2)            | 1 (3.2)           | 6 (11.3)               | 3 (6.5)            | 4 (22.2)              | <sup>1</sup> 0.235<br><sup>2</sup> .199                         |
| <b>Impact of COVID-response on quality:</b> Do you believe your CF program is delivering the same level of quality care despite actions that your institution / hospital took to respond to COVID-19? (n, % yes) |                    |                    |                     |                   |                        |                    |                       |                                                                 |
|                                                                                                                                                                                                                  | 94 (80.3)          | 40 (88.9)          | 36 (87.8)           | 18 (58.1)         | 47 (88.7)              | 31 (67.4)          | 16 (88.9)             | <sup>1</sup> <0.001<br><sup>2</sup> 0.018<br><sup>3</sup> 0.052 |

1 = Analysis of dependent variable by program size; 2 = Analysis of dependent variable by program type. 3 = Comparison between SoC1 and SoC2

14  
15  
16  
17  
18  
19  
20  
21  
22  
23  
24  
25  
26  
27  
28  
29  
30  
31  
32  
33  
34  
35  
36  
37  
38  
39  
40  
41  
42  
43  
44  
45  
46  
47  
48  
49  
50  
51  
52  
53  
54  
55  
56  
57  
58  
59  
60  
61  
62  
63  
64  
65

**Table S2: Impact of COVID-19 pandemic on licensure of CF clinical care staff and care delivery**

|                                                                                                                                                                              | Total<br>(n = 286) | Small<br>(n = 113) | Medium<br>(n = 105) | Large<br>(n = 68) | Pediatric<br>(n = 128) | Adult<br>(n = 118) | Affiliate<br>(n = 40) | P-value                                   |
|------------------------------------------------------------------------------------------------------------------------------------------------------------------------------|--------------------|--------------------|---------------------|-------------------|------------------------|--------------------|-----------------------|-------------------------------------------|
| <b>Out-of-state patients:</b> Does your program have patients located in a state other than where your program is located? (% yes)                                           | 199 (70.3)         | 67 (60.9)          | 73 (69.5)           | 59 (86.8)         | 84 (66.1)              | 97 (82.9)          | 18 (46.2)             | <sup>1</sup> <0.001<br><sup>2</sup> <.001 |
| Approximate % of patients out-of-state; (Median; Inter-quartile range)                                                                                                       | 6 (3-15)           | 7 (2-14)           | 5 (2-15)            | 10 (5-20)         | 6.5 (3-15)             | 7 (3-15)           | 4 (1-26)              |                                           |
| <b>Availability of licensing waivers:</b> Are licensing waivers available in states where your out-of-state patients live?                                                   |                    |                    |                     |                   |                        |                    |                       | <sup>1</sup> 0.005<br><sup>2</sup> 0.117  |
| All                                                                                                                                                                          | 49 (24.6)          | 21 (31.3)          | 17 (23.3)           | 11 (18.6)         | 25 (29.8)              | 17 (17.5)          | 7 (38.9)              |                                           |
| Some                                                                                                                                                                         | 48 (24.1)          | 12 (17.9)          | 11 (15.1)           | 25 (42.4)         | 23 (27.4)              | 24 (24.7)          | 1 (5.6)               |                                           |
| None                                                                                                                                                                         | 16 (8)             | 6 (9)              | 5 (6.8)             | 5 (8.5)           | 4 (4.8)                | 10 (10.3)          | 2 (11.1)              |                                           |
| Don't know                                                                                                                                                                   | 86 (43.2)          | 28 (41.8)          | 40 (54.8)           | 18 (30.5)         | 32 (38.1)              | 46 (47.4)          | 8 (44.4)              |                                           |
| <b>Completion of waivers:</b> Did your program complete any licensing waivers?                                                                                               | 57 (58.8)          | 17 (51.5)          | 15 (53.6)           | 25 (69.4)         | 29 (60.4)              | 27 (65.9)          | 1 (12.5)              | <sup>1</sup> 0.256<br><sup>2</sup> 0.019  |
| Have your program's clinical care team members obtained out-of-state licensure to deliver telehealth services to patients?                                                   |                    |                    |                     |                   |                        |                    |                       | <sup>1</sup> 0.051<br><sup>2</sup> 0.041  |
| Yes, for all states                                                                                                                                                          | 14 (7)             | 6 (9)              | 2 (2.7)             | 6 (10.2)          | 8 (9.5)                | 2 (2.1)            | 4 (22.2)              |                                           |
| Yes, for some states                                                                                                                                                         | 43 (21.6)          | 16 (23.9)          | 12 (16.4)           | 15 (25.4)         | 20 (23.8)              | 22 (22.7)          | 1 (5.6)               |                                           |
| No states                                                                                                                                                                    | 114 (57.3)         | 34 (50.7)          | 44 (60.3)           | 36 (61)           | 46 (54.8)              | 58 (59.8)          | 10 (55.6)             |                                           |
| Don't know                                                                                                                                                                   | 28 (14.1)          | 11 (16.4)          | 15 (20.5)           | 2 (3.4)           | 10 (11.9)              | 15 (15.5)          | 3 (16.7)              |                                           |
| Proportion of care programs with any out-of-state patients not able to access telehealth services due to issues related to licensure of your program's clinical team members | 37 (20.1)          | 3 (4.9)            | 14 (19.7)           | 20 (38.5)         | 15 (19.7)              | 21 (22.3)          | 1 (7.1)               | <sup>1</sup> <0.001<br><sup>2</sup> 0.414 |

1 = Analysis of dependent variable by program size; 2 = Analysis of dependent variable by program type

14  
15  
16  
17  
18  
19  
20  
21  
22  
23  
24  
25  
26  
27  
28  
29  
30  
31  
32  
33  
34  
35  
36  
37  
38  
39  
40  
41  
42  
43  
44  
45  
46  
47  
48  
49  
50  
51  
52  
53  
54  
55  
56  
57  
58  
59  
60  
61  
62  
63  
64  
65

**Table S3: Availability to provide telehealth services\* (SoC1: Summer 2020)**

|                            | Yes, available to provide telehealth |     | No, telehealth services not reimbursable |      | No, licensing restrictions |      | No, not able to access telehealth technology |      | No, redeployed to other duties |    | No, furloughed |      |
|----------------------------|--------------------------------------|-----|------------------------------------------|------|----------------------------|------|----------------------------------------------|------|--------------------------------|----|----------------|------|
| Physician (MD)             | 142                                  | 98% | 1                                        | 0.7% | 1                          | 0.7% | 1                                            | 0.7% |                                |    |                |      |
| Registered nurse (RN)      | 97                                   | 67% | 40                                       | 28%  | 3                          | 2%   | 4                                            | 3%   |                                |    | 1              | 0.7% |
| Registered dietitian (RD)  | 105                                  | 72% | 28                                       | 19%  | 4                          | 3%   | 5                                            | 3%   | 3                              | 2% |                |      |
| Social work (SW)           | 90                                   | 62% | 36                                       | 25%  | 10                         | 7%   | 6                                            | 4%   | 2                              | 1% | 1              | 0.7% |
| Respiratory therapist (RT) | 83                                   | 57% | 40                                       | 28%  | 5                          | 3%   | 7                                            | 5%   | 10                             | 7% |                |      |

\*Data provided from program directors that indicated at least some reimbursement limitations for telehealth (n=145)

14  
15  
16  
17  
18  
19  
20  
21  
22  
23  
24  
25  
26  
27  
28  
29  
30  
31  
32  
33  
34  
35  
36  
37  
38  
39  
40  
41  
42  
43  
44  
45  
46  
47  
48  
49  
50  
51  
52  
53  
54  
55  
56  
57  
58  
59  
60  
61  
62  
63  
64  
65

**Table S4: Reported differences with telehealth reimbursement (SoC1: Summer 2020)**

|                                                                                                                                                            | <b>Total</b><br>(n = 286) | <b>Small</b><br>(n = 113) | <b>Medium</b><br>(n = 105) | <b>Large</b><br>(n = 68) | <b>Pediatric</b><br>(n = 128) | <b>Adult</b><br>(n = 118) | <b>Affiliate</b><br>(n = 40) | <b>P-value</b>                           |
|------------------------------------------------------------------------------------------------------------------------------------------------------------|---------------------------|---------------------------|----------------------------|--------------------------|-------------------------------|---------------------------|------------------------------|------------------------------------------|
| <b>Reimbursement:</b> How does reimbursement for telehealth services compare to equivalent in-person services (e.g., routine visit with physician)? (n, %) |                           |                           |                            |                          |                               |                           |                              | <sup>1</sup> 0.366<br><sup>2</sup> 0.954 |
| Somewhat more                                                                                                                                              | 1 (0.4)                   | 0 (0)                     | 0 (0)                      | 1 (1.9)                  | 1 (0.9)                       | 0 (0)                     | 0 (0)                        |                                          |
| About the same                                                                                                                                             | 141 (61.8)                | 50 (58.1)                 | 57 (64)                    | 34 (64.2)                | 67 (63.2)                     | 58 (61.1)                 | 16 (59.3)                    |                                          |
| Somewhat less                                                                                                                                              | 54 (23.7)                 | 22 (25.6)                 | 23 (25.8)                  | 9 (17)                   | 23 (21.7)                     | 24 (25.3)                 | 7 (25.9)                     |                                          |
| Much less                                                                                                                                                  | 32 (14)                   | 14 (16.3)                 | 9 (10.1)                   | 9 (17)                   | 15 (14.2)                     | 13 (13.7)                 | 4 (14.8)                     |                                          |
| On average what percent less are telehealth services reimbursed than in-person services? Median; Inter-quartile range                                      | 25.0 (20-47)              | 27.5 (20-45)              | 25 (18-45)                 | 30 (20-60)               | 25 (20-50)                    | 30 (20-50)                | 25 (20-30)                   | <sup>1</sup> 0.722<br><sup>2</sup> 0.452 |
| What effect has <b>less reimbursement</b> for telehealth services had on your program? Clinical team members are (n, %)                                    |                           |                           |                            |                          |                               |                           |                              |                                          |
| Spending less time with patients                                                                                                                           | 22 (25.6)                 | 9 (25)                    | 10 (31.3)                  | 3 (16.7)                 | 9 (23.7)                      | 11 (29.7)                 | 2 (18.2)                     | <sup>1</sup> 0.523<br><sup>2</sup> 0.697 |
| Not able to see patients                                                                                                                                   | 23 (26.7)                 | 9 (25)                    | 8 (25)                     | 6 (33.3)                 | 7 (18.4)                      | 15 (40.5)                 | 1 (9.1)                      | <sup>1</sup> 0.777<br><sup>2</sup> 0.035 |
| Laid off                                                                                                                                                   | 1 (1.2)                   | 0 (0)                     | 0 (0)                      | 1 (5.6)                  | 0 (0)                         | 1 (2.7)                   | 0 (0)                        | N/A                                      |
| Furloughed                                                                                                                                                 | 14 (16.3)                 | 7 (19.4)                  | 5 (15.6)                   | 2 (11.1)                 | 8 (21.1)                      | 3 (8.1)                   | 3 (27.3)                     | <sup>1</sup> 0.731<br><sup>2</sup> 0.181 |
| Re-deployed to other duties                                                                                                                                | 18 (20.9)                 | 7 (19.4)                  | 5 (15.6)                   | 6 (33.3)                 | 10 (26.3)                     | 5 (13.5)                  | 3 (27.3)                     | <sup>1</sup> 0.322<br><sup>2</sup> 0.339 |

1 = Analysis of dependent variable by program size; 2 = Analysis of dependent variable by program type
